# Supplementary material for: An Evaluation of Medication Prescribing Patterns for Acute Migraine in the Emergency Department: A Scoping Review
Source: MDPI journal article supplement (doi:10.3390/jcm10061191), 2021-03-12
Supplement: s1 [file s1]

### Supplemental material S1: Description of the manual search strategy

The aforementioned keywords (Migraine, acute care, emergency department, analgesic, triptan, opioid and NSAID) were searched using Google Scholar with a custom range of 2000 until 2020. Search results were sorted by relevance and titles on the first three pages of results were screened for relevance. The manual search did not contribute to eligible papers for inclusion in our scoping review.

**Table S1: Search strategy example from Ovid Medline**

| #  | Searches                                                                                                      | Results |
|----|---------------------------------------------------------------------------------------------------------------|---------|
| 1  | exp Migraine Disorders/                                                                                       | 27361   |
| 2  | migraine*.ti,ab.                                                                                              | 34929   |
| 3  | 1 or 2                                                                                                        | 39583   |
| 4  | exp Emergency Service, Hospital/                                                                              | 79345   |
| 5  | ((emergency or trauma or acute) adj2 (department* or service* or unit* or centre* or center* or care)).ti,ab. | 169642  |
| 6  | 4 or 5                                                                                                        | 197348  |
| 7  | exp Analgesics/                                                                                               | 534101  |
| 8  | exp Tryptamines/                                                                                              | 93416   |
| 9  | exp Analgesics, Opioid/                                                                                       | 116848  |
| 10 | exp Anti-inflammatory Agents, Non-steroidal/                                                                  | 198161  |
| 11 | (analgesic* or triptan* or opioid* or NSAID*).ti,ab.                                                          | 177757  |
| 12 | 7 or 8 or 9 or 10 or 11                                                                                       | 701733  |
| 13 | 3 and 6 and 12                                                                                                | 305     |

**Table S2: Search strategy example from Ovid Medline**

| Database                                                   | Returned results |
|------------------------------------------------------------|------------------|
| Ovid MEDLINE(R) ALL, Embase Classic + embase, APA Psycinfo | 1008             |
| Pubmed                                                     | 131              |
| Cochrane                                                   | 60               |
| CINAHL                                                     | 86               |
| PsycInfo                                                   | 17               |
| <b>Total</b>                                               | 1302             |

The searches were performed between the 5<sup>th</sup> of September 2020 and the 24<sup>th</sup> of September 2020. The following table shows the number of studies attained from each search.

**Table S3: Rationale for exclusion with respective number of articles excluded.**

| <b>Rationale for exclusion</b> | <b>Number of articles excluded</b> |
|--------------------------------|------------------------------------|
| Inappropriate outcomes         | 156                                |
| Inappropriate design           | 45                                 |
| Inappropriate population       | 56                                 |
| Outside inclusion criteria     | 4                                  |
| Unfiltered duplication         | 6                                  |
| <b>Total</b>                   | <b>267</b>                         |
